# Supplementary material for: 1,7-Bis-(N,N-dialkylamino)perylene Bisimides: Facile Synthesis and Characterization as Near-Infrared Fluorescent Dyes
Source: MDPI journal article supplement (doi:10.3390/ma7117548), 2014-11-24

## Supplementary Materials

Figure S1. Normalized absorption spectra of **1b** in various solvents.

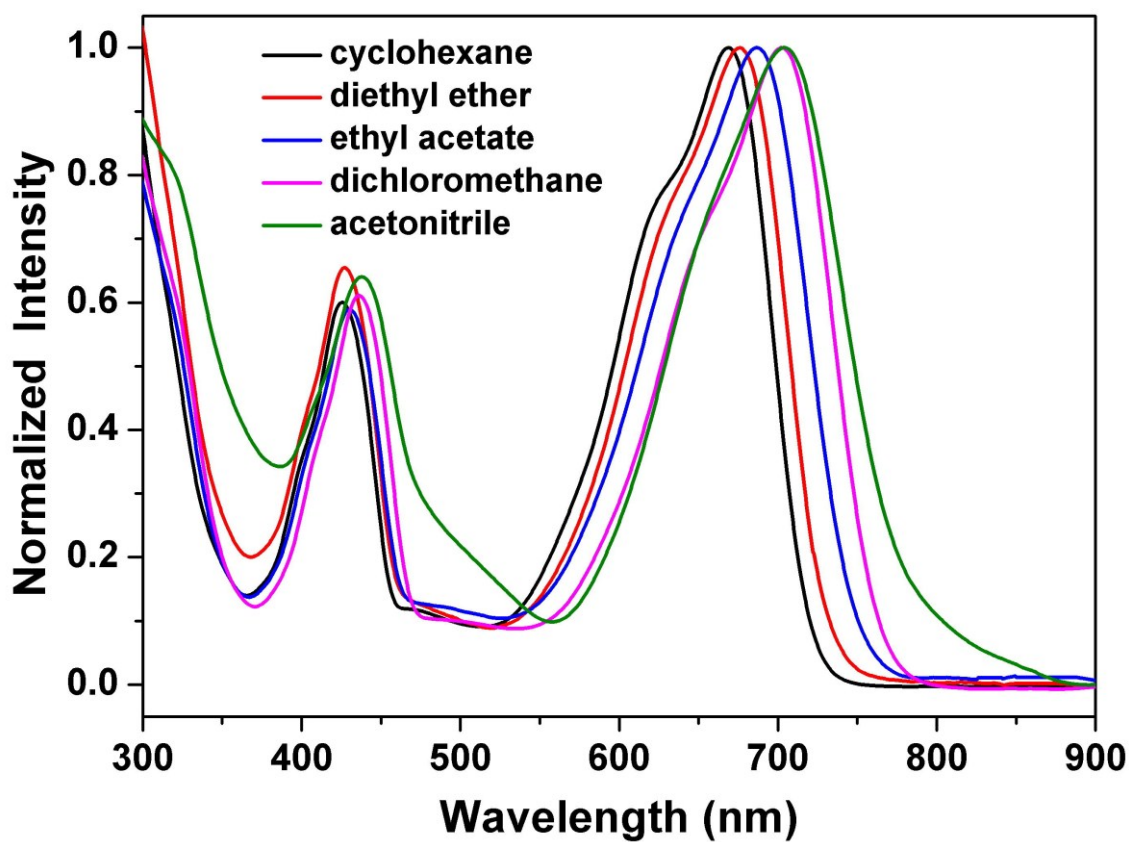

Figure S2. Normalized emission spectra of **1b** in various solvents.

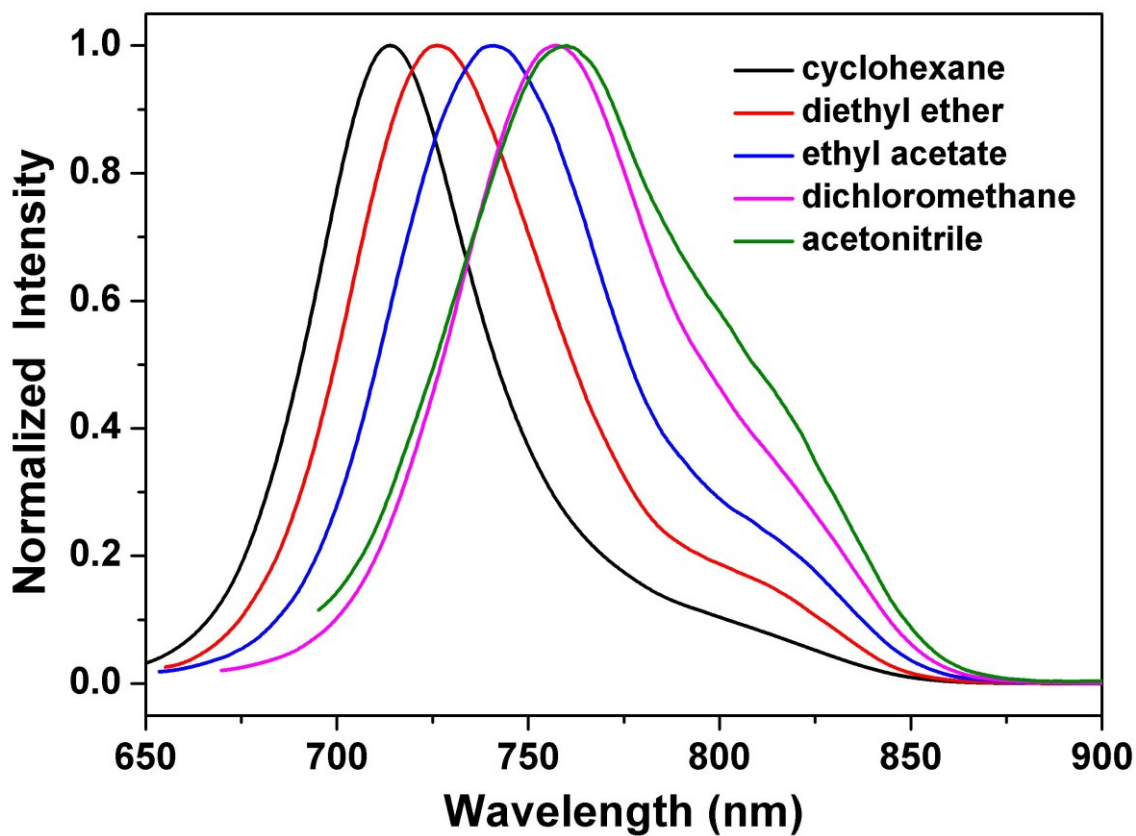

Figure S3. Normalized absorption spectra of **1c** in various solvents.

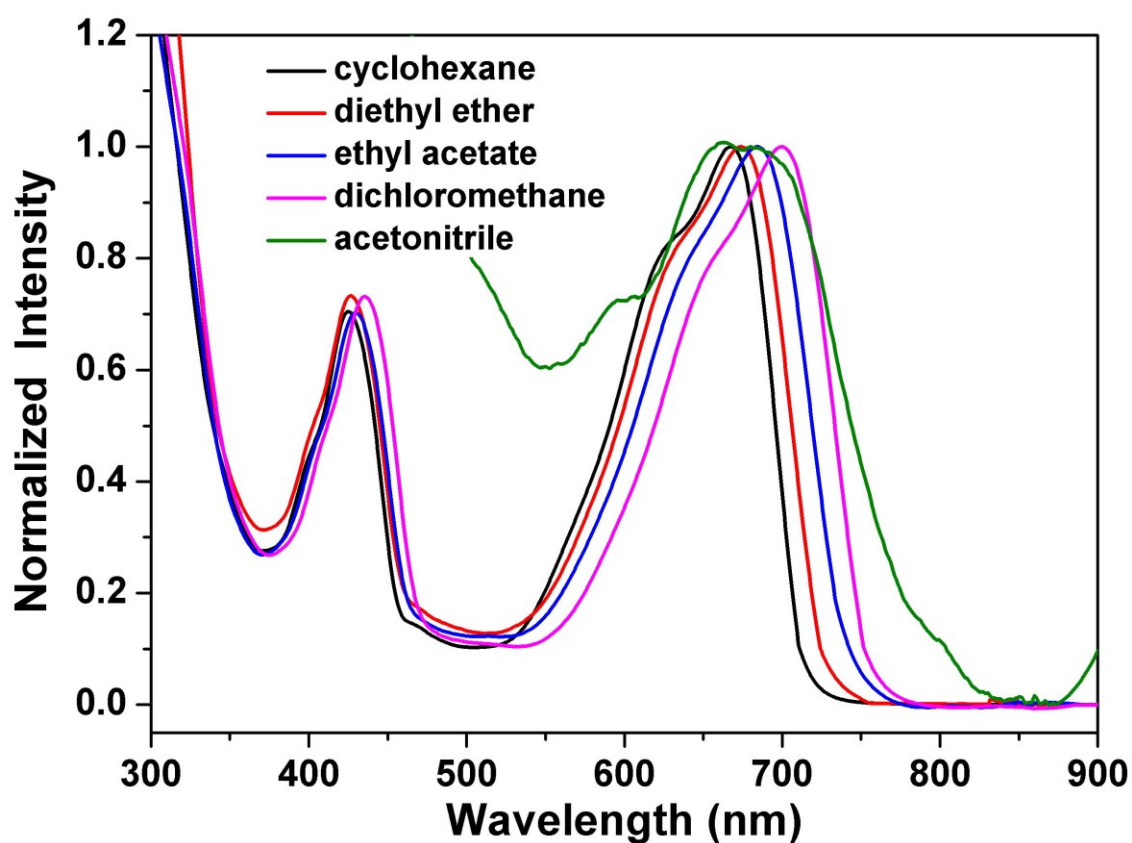

Figure S4. Normalized emission spectra of **1c** in various solvents.

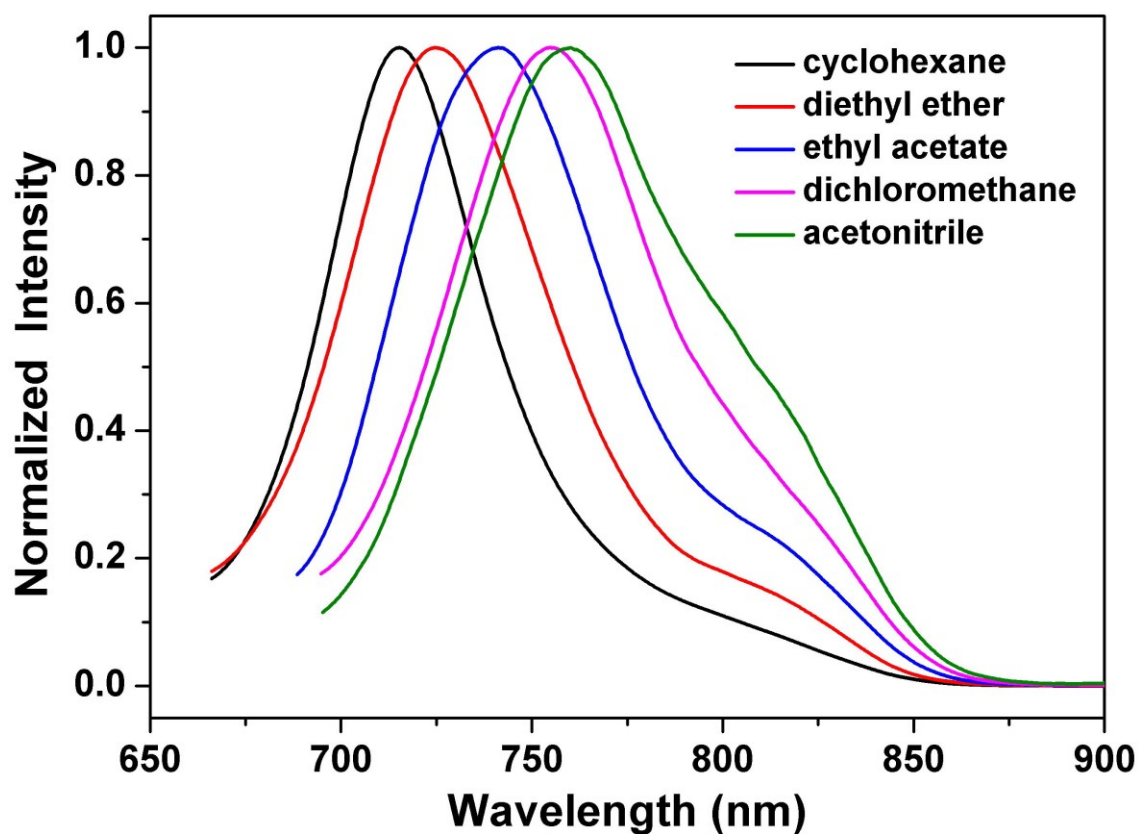

Figure S5.  $^1\text{H}$  NMR of 1a.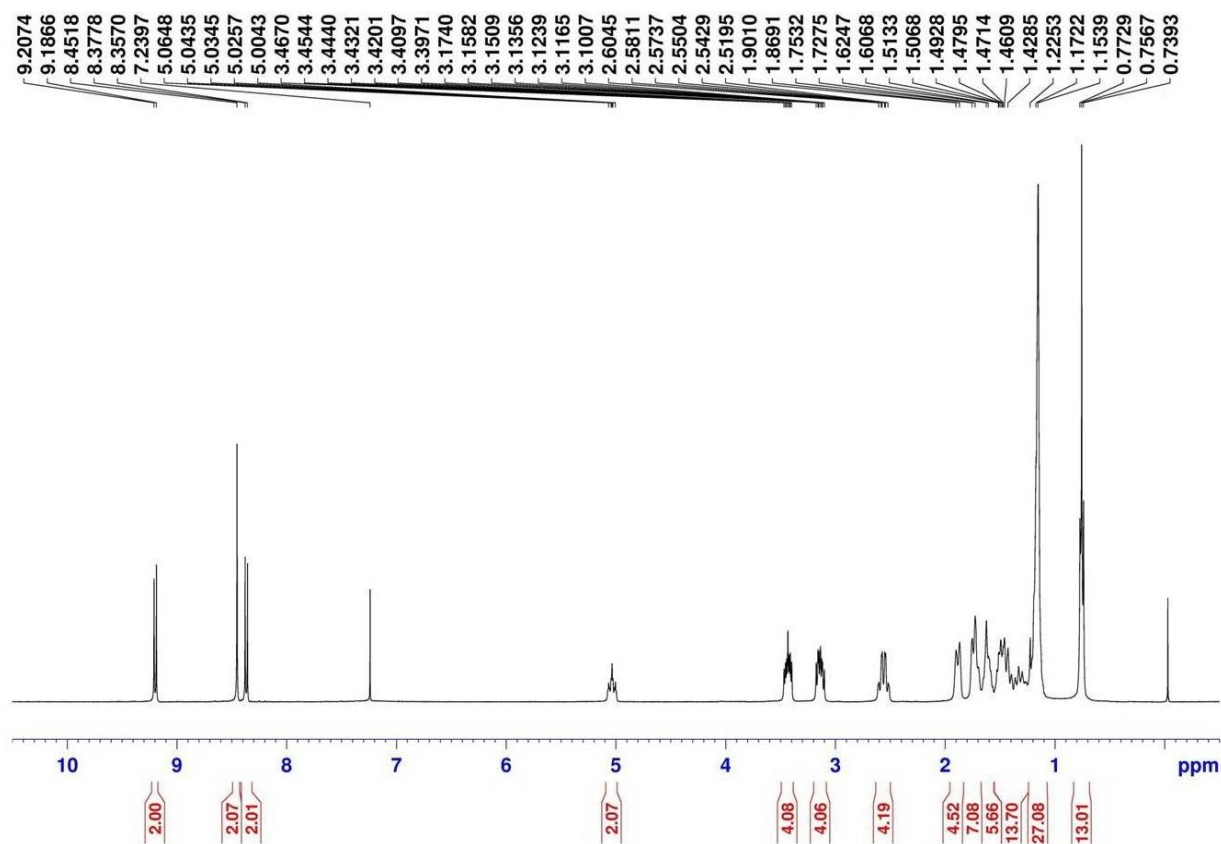Figure S6.  $^1\text{H}$  NMR of 1b.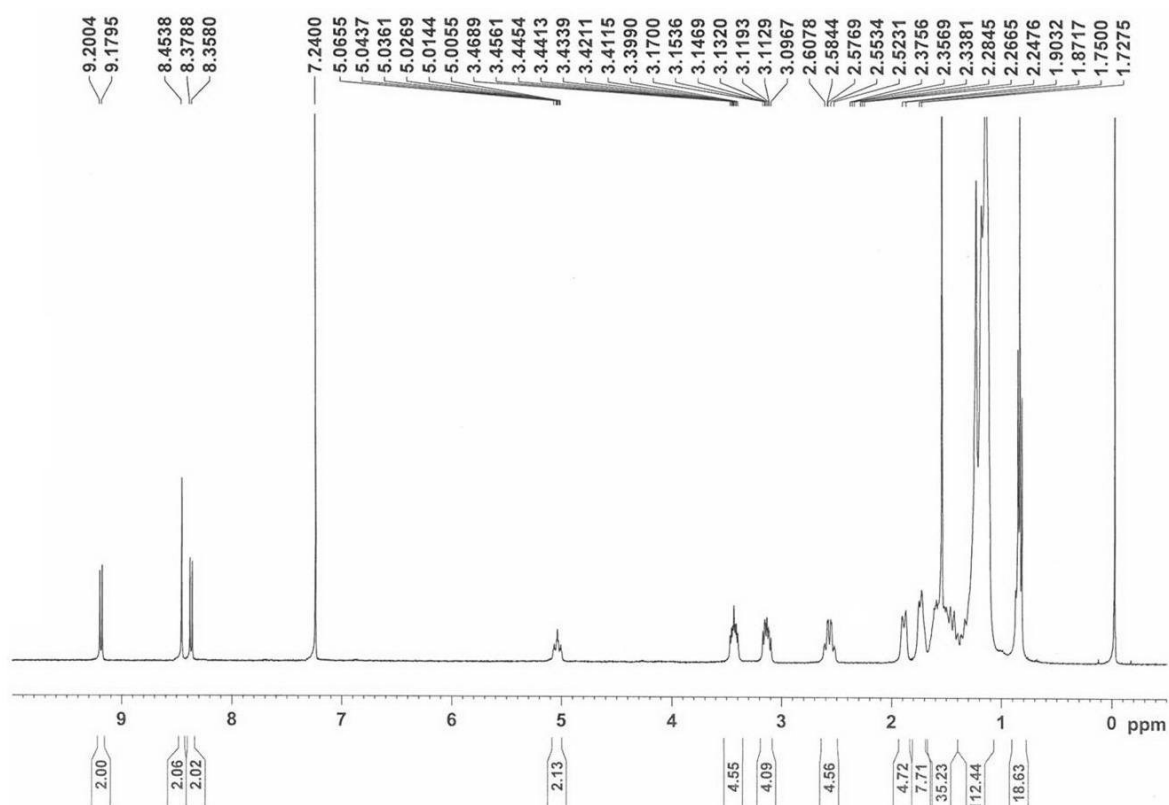

Figure S7.  $^1\text{H}$  NMR of **1c**.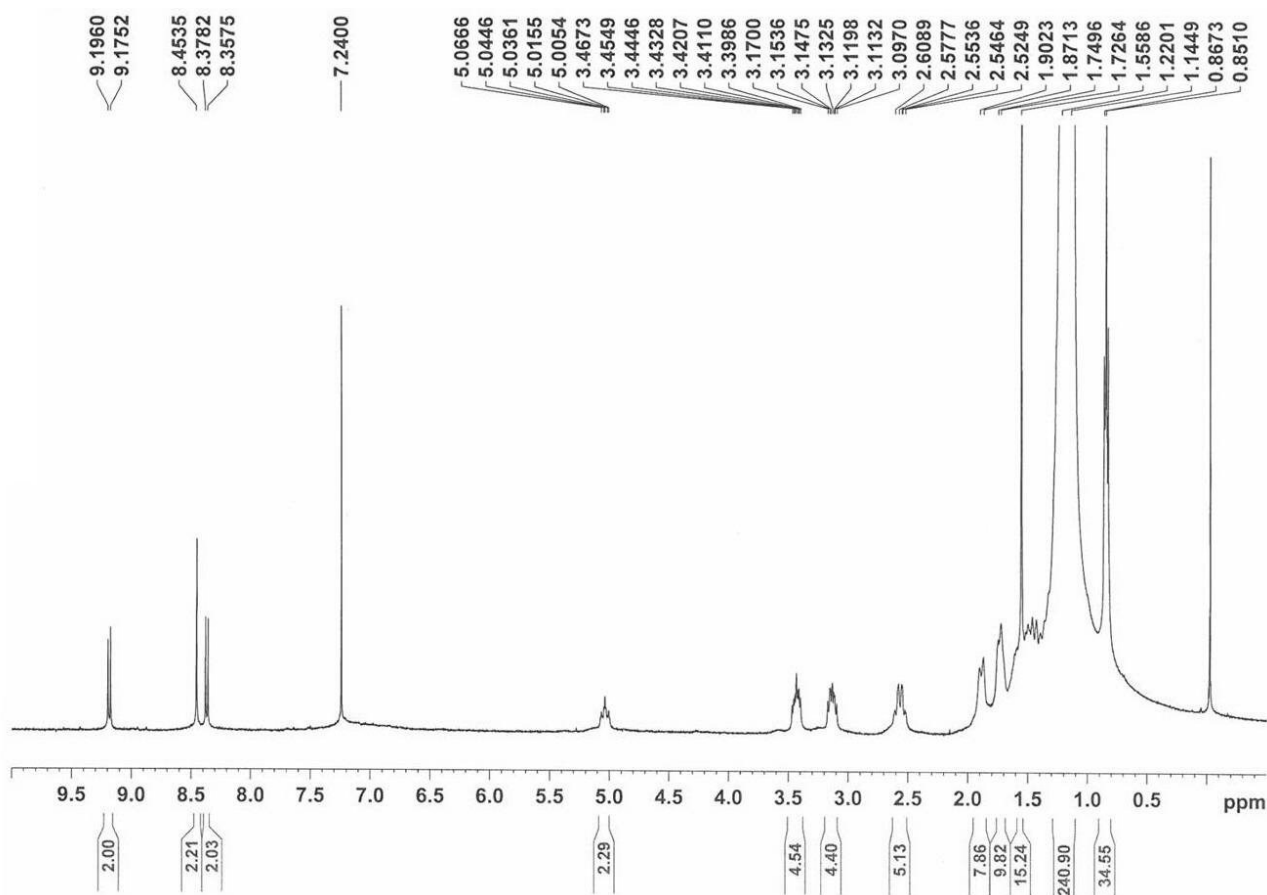Figure S8.  $^{13}\text{C}$  NMR of **1a**.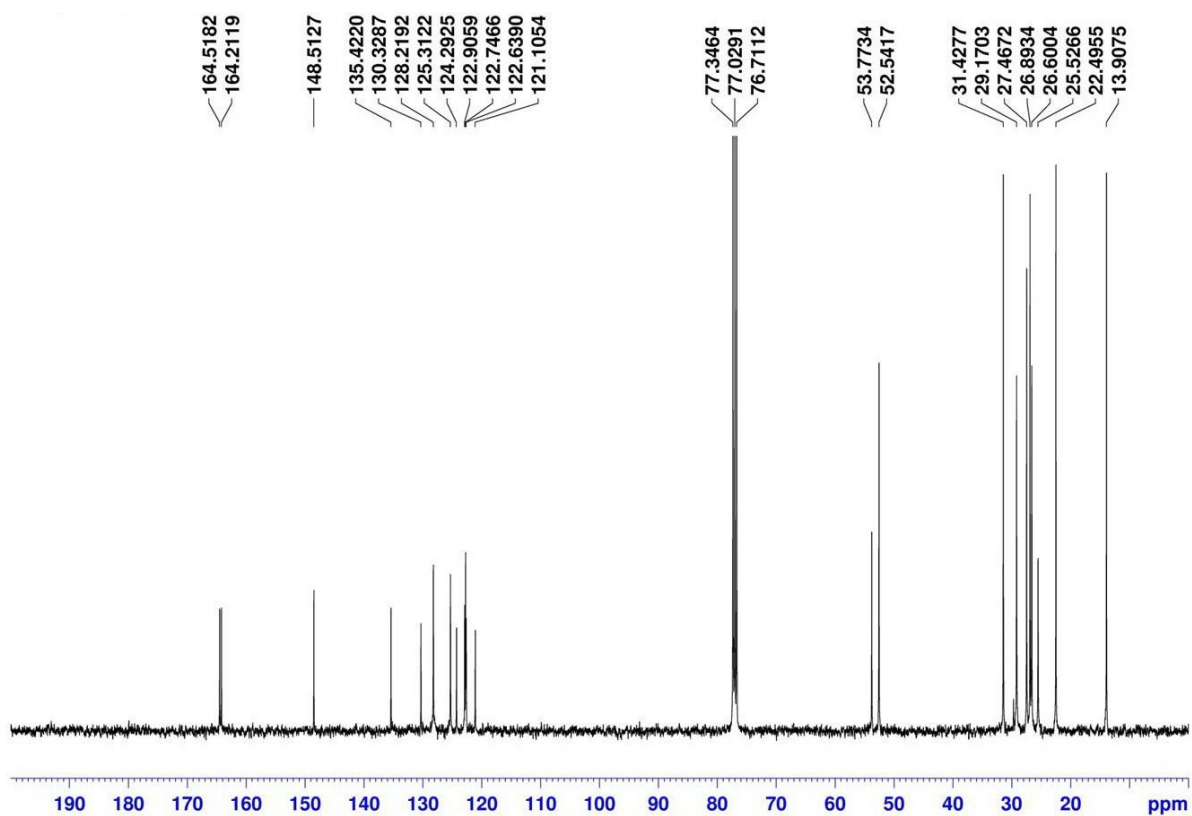

Figure S9.  $^{13}\text{C}$  NMR of **1b**.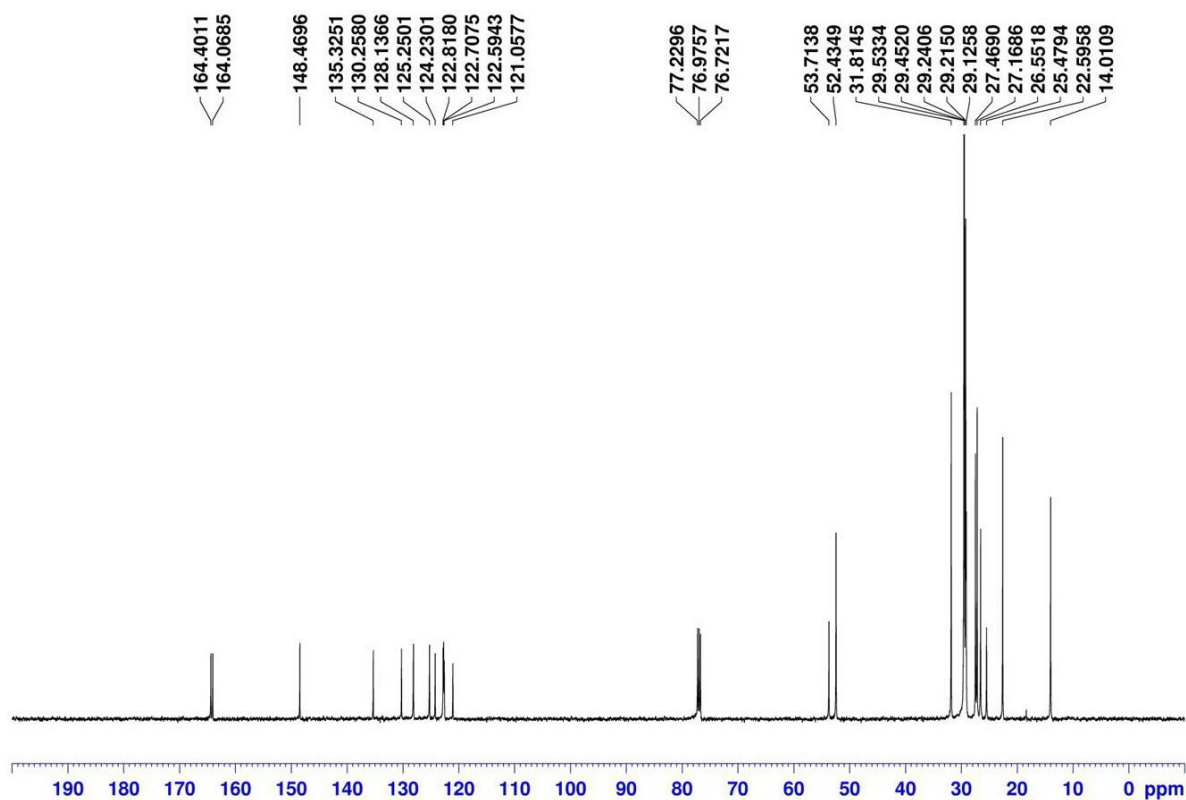Figure S10.  $^{13}\text{C}$  NMR of **1c**.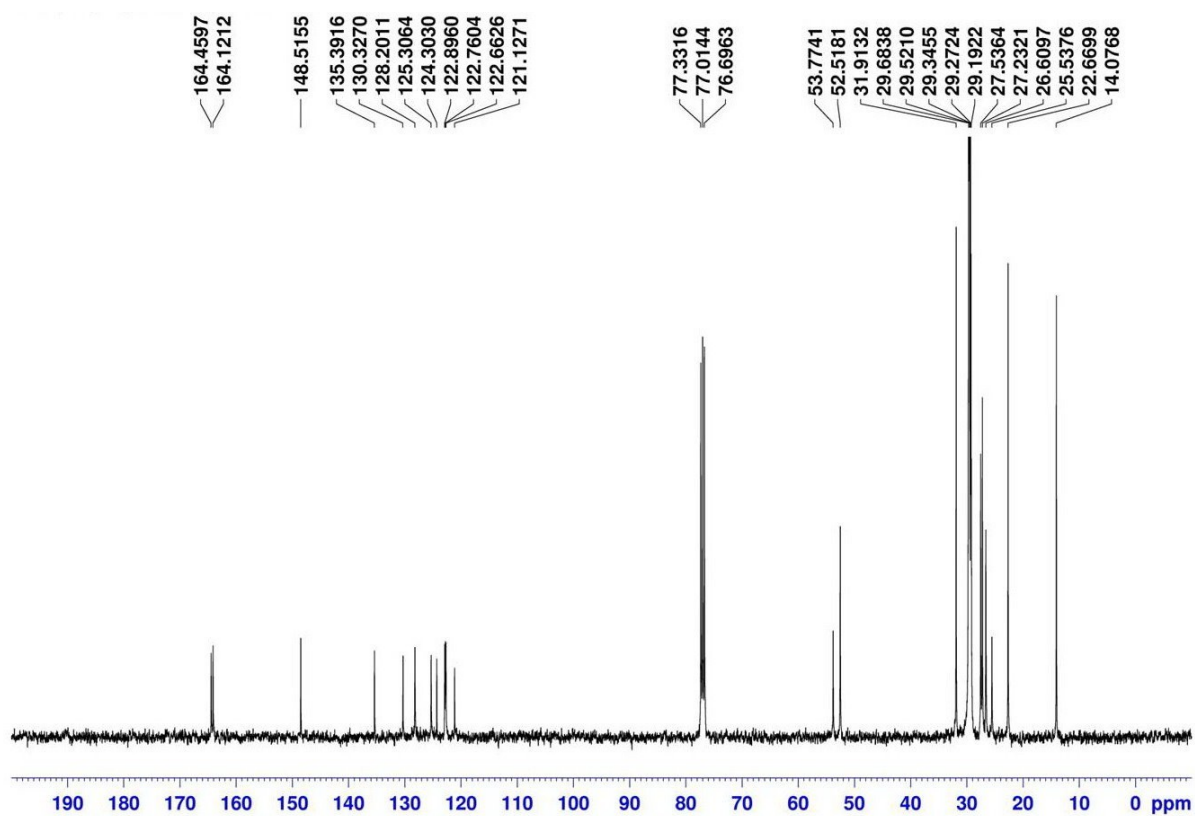

Supplement: s1 [file s1]
